# Supplementary material for: Assessment of Time Lag Between Blood Flow, Retinal Nerve Fiber Layer Thickness and Visual Field Sensitivity Changes in Glaucoma
Source: PubMed Central journal article supplement — Invest Ophthalmol Vis Sci. 2024 Apr 2;65(4):7. doi: 10.1167/iovs.65.4.7 (PMC10996942; doi:10.1167/iovs.65.4.7), 2024-04-02
Supplement: iovs-65-4-7_s001.pdf [file iovs-65-4-7_s001.pdf]

**Table S1.** Coefficients for the Models testing MBR in ONH vessels against Mean Deviation and Retinal Nerve Fiber Layer using data from ten rates

|                | N of Eyes | $\beta$                                                     | Coefficient | $p$          | Root Mean Square Error of Approximation (RMSEA) | Comparative Fit Index (CFI) | Tucker Lewis Index (TLI) |
|----------------|-----------|-------------------------------------------------------------|-------------|--------------|-------------------------------------------------|-----------------------------|--------------------------|
| <b>Model A</b> | 345       | RNFLT Rate <sub>n</sub> predicting MBRv Rate <sub>n</sub>   | -0.028      | 0.267        | 0.089<br>(CI: 0.082, 0.095)                     | 0.374                       | 0.455                    |
| <b>Model B</b> | 345       | RNFLT Rate <sub>n-1</sub> predicting MBRv Rate <sub>n</sub> | -0.028      | 0.267        | 0.089<br>(CI: 0.082, 0.095)                     | 0.374                       | 0.455                    |
| <b>Model C</b> | 345       | MBRv Rate <sub>n</sub> predicting RNFLT Rate <sub>n</sub>   | -0.056      | <b>0.008</b> | 0.088<br>(CI: 0.082, 0.095)                     | 0.380                       | 0.460                    |
| <b>Model D</b> | 345       | MBRv Rate <sub>n-1</sub> predicting RNFLT Rate <sub>n</sub> | 0.074       | <b>0.001</b> | 0.088<br>(CI: 0.082, 0.095)                     | 0.385                       | 0.464                    |
| <b>Model A</b> | 345       | MD Rate <sub>n</sub> predicting MBRv Rate <sub>n</sub>      | 0.085       | 0.284        | 0.072<br>(CI: 0.065, 0.079)                     | 0.575                       | 0.630                    |
| <b>Model B</b> | 345       | MD Rate <sub>n-1</sub> predicting MBRv Rate <sub>n</sub>    | 0.268       | <b>0.001</b> | 0.071<br>(CI: 0.064, 0.078)                     | 0.586                       | 0.639                    |
| <b>Model C</b> | 345       | MBRv Rate <sub>n</sub> predicting MD Rate <sub>n</sub>      | 0.012       | 0.075        | 0.072<br>(CI: 0.065, 0.079)                     | 0.577                       | 0.632                    |
| <b>Model D</b> | 345       | MBRv Rate <sub>n-1</sub> predicting MD Rate <sub>n</sub>    | 0.007       | 0.313        | 0.072<br>(CI: 0.065, 0.079)                     | 0.575                       | 0.630                    |

**Table S2.** Coefficients for the Models testing MBR in ONH tissues against Mean Deviation and Retinal Nerve Fiber Layer using data from ten rates

|                | N of Eyes | $\beta$                                                     | Coefficient | $p$          | Root Mean Square Error of Approximation (RMSEA) | Comparative Fit Index (CFI) | Tucker Lewis Index (TLI) |
|----------------|-----------|-------------------------------------------------------------|-------------|--------------|-------------------------------------------------|-----------------------------|--------------------------|
| <b>Model A</b> | 345       | RNFLT Rate <sub>n</sub> predicting MBRT Rate <sub>n</sub>   | -0.00       | 0.983        | 0.099<br>(CI: 0.093, 0.106)                     | 0.320                       | 0.408                    |
| <b>Model B</b> | 345       | RNFLT Rate <sub>n-1</sub> predicting MBRT Rate <sub>n</sub> | -0.012      | 0.143        | 0.099<br>(CI: 0.093, 0.106)                     | 0.322                       | 0.409                    |
| <b>Model C</b> | 345       | MBRT Rate <sub>n</sub> predicting RNFLT Rate <sub>n</sub>   | -0.107      | 0.106        | 0.099<br>(CI: 0.093, 0.106)                     | 0.323                       | 0.4110                   |
| <b>Model D</b> | 345       | MBRT Rate <sub>n-1</sub> predicting RNFLT Rate <sub>n</sub> | 0.214       | <b>0.001</b> | 0.099<br>(CI: 0.092, 0.105)                     | 0.330                       | 0.416                    |
| <b>Model A</b> | 345       | MD Rate <sub>n</sub> predicting MBRT Rate <sub>n</sub>      | 0.010       | 0.695        | 0.075<br>(CI: 0.069, 0.082)                     | 0.551                       | 0.608                    |
| <b>Model B</b> | 345       | MD Rate <sub>n-1</sub> predicting MBRT Rate <sub>n</sub>    | 0.040       | 0.122        | 0.075<br>(CI: 0.068, 0.082)                     | 0.553                       | 0.611                    |
| <b>Model C</b> | 345       | MBRT Rate <sub>n</sub> predicting MD Rate <sub>n</sub>      | 0.003       | 0.874        | 0.075<br>(CI: 0.069, 0.082)                     | 0.551                       | 0.608                    |
| <b>Model D</b> | 345       | MBRT Rate <sub>n-1</sub> predicting MD Rate <sub>n</sub>    | 0.042       | 0.051        | 0.075<br>(CI: 0.068, 0.082)                     | 0.555                       | 0.612                    |
